# Supplementary material for: Deep Plasma Proteome Profiling by Modulating Single Nanoparticle Protein Corona with Small Molecules
Source: PubMed Central journal article supplement — bioRxiv. 2024 Sep 9:2024.03.06.582595. Originally published 2024 Mar 8. Preprint. [Version 2] doi: 10.1101/2024.03.06.582595 (PMC10942461; doi:10.1101/2024.03.06.582595), 2024-09-09
Supplement: media-1.pdf [file media-1.pdf]

# Deep Plasma Proteome Profiling by Modulating Single Nanoparticle Protein Corona with Small Molecules

Ali Akbar Ashkarran<sup>1#</sup>, Hassan Gharibi<sup>2#</sup>, Seyed Majed Modaresi<sup>3</sup>, Maryam Sayadi<sup>4</sup>, Maryam Jafari<sup>5</sup>, Zijin Lin<sup>1</sup>, Danilo Ritz<sup>6</sup>, David Kakhniashvili<sup>7</sup>, Liangliang Sun<sup>8</sup>, Markita P. Landry<sup>9,10,11</sup>, Amir Ata Saei<sup>3,12\*</sup> and Morteza Mahmoudi<sup>1\*</sup>

<sup>1</sup>Department of Radiology and Precision Health Program, Michigan State University, East Lansing, MI 48824, USA

<sup>2</sup>Division of Chemistry I, Department of Medical Biochemistry and Biophysics, Karolinska Institutet, Stockholm, Sweden

<sup>3</sup>Biozentrum, University of Basel, 4056 Basel, Switzerland

<sup>4</sup>Department of Biomedical Engineering, Michigan State University, East Lansing, MI 48824, USA

<sup>5</sup>Division of ENT Diseases, Department of Clinical Science, Intervention and Technology, Karolinska Institutet, Stockholm, Sweden

<sup>6</sup>Proteomics Core Facility, Biozentrum, University of Basel, 4056 Basel, Switzerland

<sup>7</sup>Proteomics and Metabolomics Core Facility, University of Tennessee Health Science Center, Memphis, TN, USA

<sup>8</sup>Department of Chemistry, Michigan State University, 578 South Shaw Lane, East Lansing, MI 48824, United States

<sup>9</sup>Department of Chemical and Biomolecular Engineering, University of California, Berkeley, Berkeley, CA, 94720, USA

<sup>10</sup>Department of Neuroscience, University of California, Berkeley, Berkeley, CA, 94720, USA

<sup>11</sup>Chan Zuckerberg Biohub, San Francisco, CA, 94063, USA

<sup>12</sup>Center for Translational Microbiome Research, Department of Microbiology, Tumor and Cell Biology, Karolinska Institutet, Stockholm 17165, Sweden

#equal contribution

\*Corresponding authors: (A.A.S.) [amir.saei@unibas.ch](mailto:amir.saei@unibas.ch); (M.M.) [mahmou22@msu.edu](mailto:mahmou22@msu.edu)

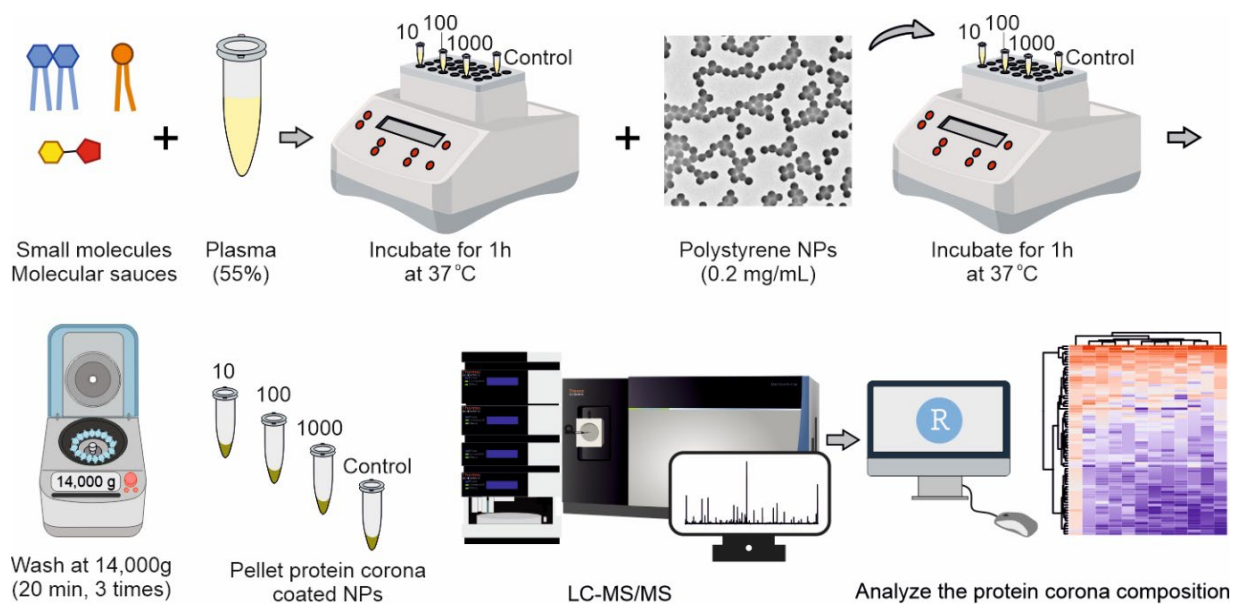

**Supplementary Scheme 1. The overall workflow of the study.** After exposing small molecules to human plasma, NPs were incubated with human plasma, purified and isolated, and used for analysis of the protein corona profile on the surface of the NPs using SDS-PAGE and LC-MS (SDS-PAGE, Sodium dodecyl-sulfate polyacrylamide gel electrophoresis).

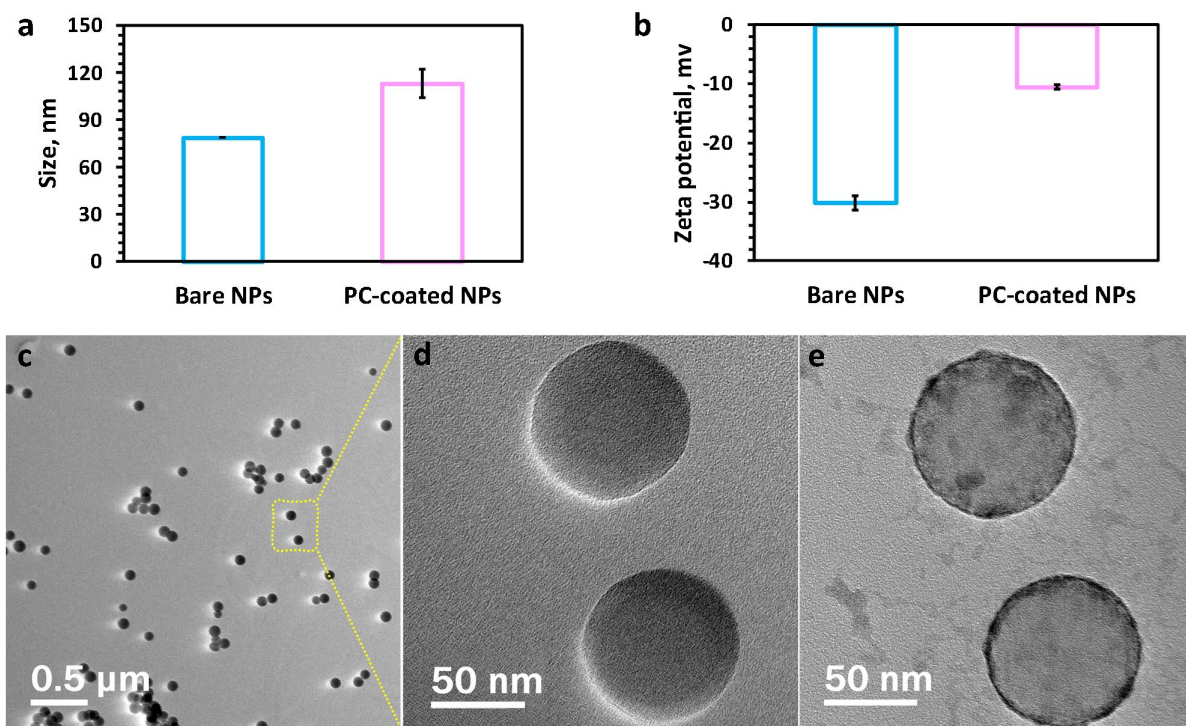

**Supplementary Fig. 1. Characterizations of the bare NPs and untreated protein corona coated NPs.** (a) and (b), DLS and zeta potential analysis of bare NPs and untreated protein corona-coated NPs respectively, (c), and (d) TEM images of bare polystyrene NPs, and (e) TEM image of protein corona-coated NPs, as representative. The polydispersity index (PDI) of bare and protein corona-coated NPs were found to be 0.023 and 0.214, respectively.

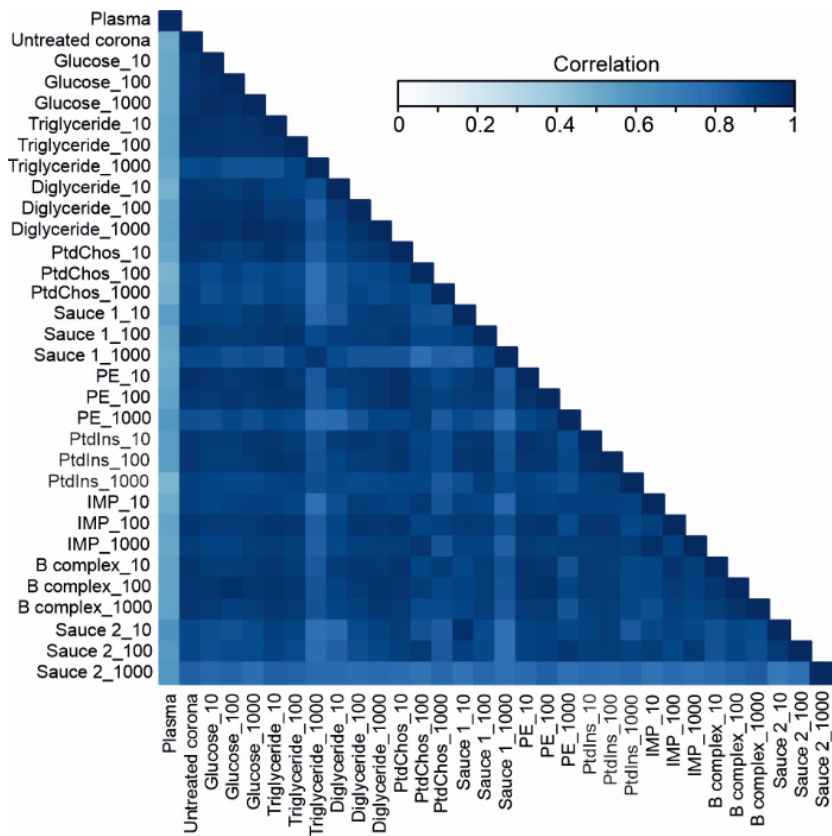

**Supplementary Fig. 2. Correlation of plasma proteome profiles.** Pearson correlation of the 117 shared proteins across all the samples (10-1000  $\mu\text{g/ml}$ ).

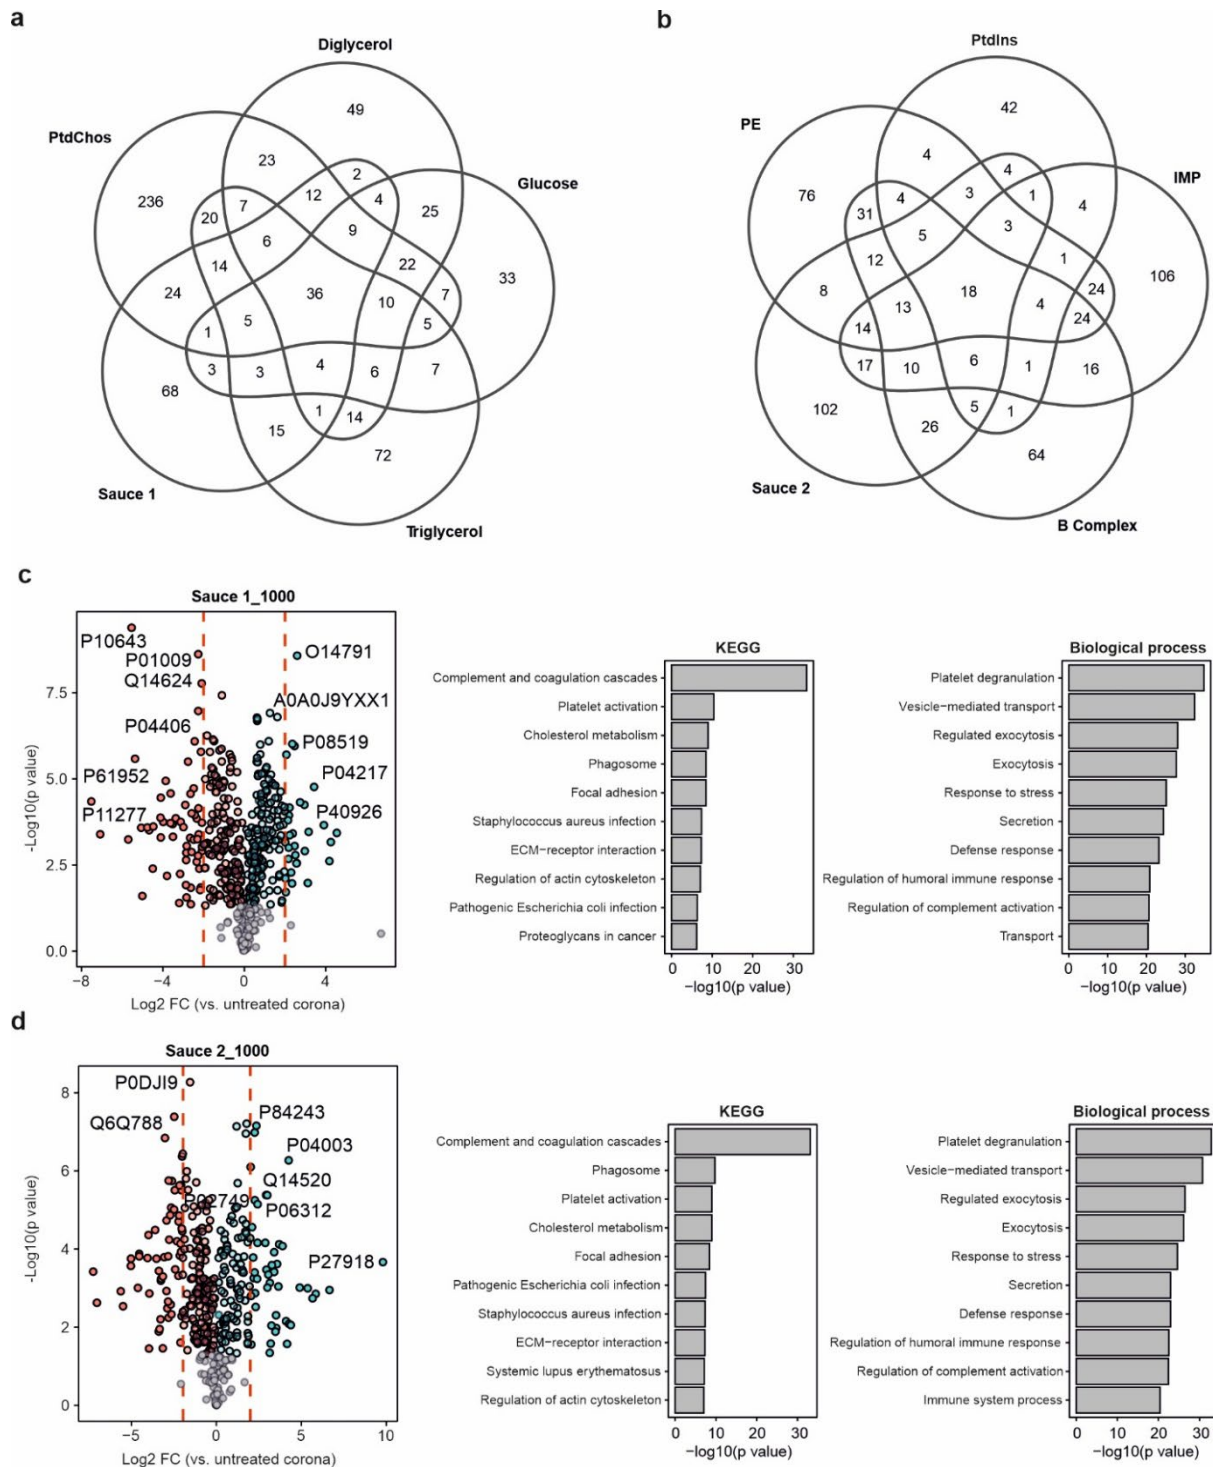

**Supplementary Fig. 3. The molecular sauces enrich or deplete specific proteins. a-b,** The number of unique proteins that were quantified in a given group which were not quantified in the plasma or with bare NPs. **c-d,** The enriched and depleted proteins for molecular sauce 1 and 2 in comparison to the untreated protein corona are shown (left panels). Respective pathway analysis was performed for all the depleted and enriched proteins (right panels). Significance was calculated using unequal variance (the Welch Two Sample t-test).

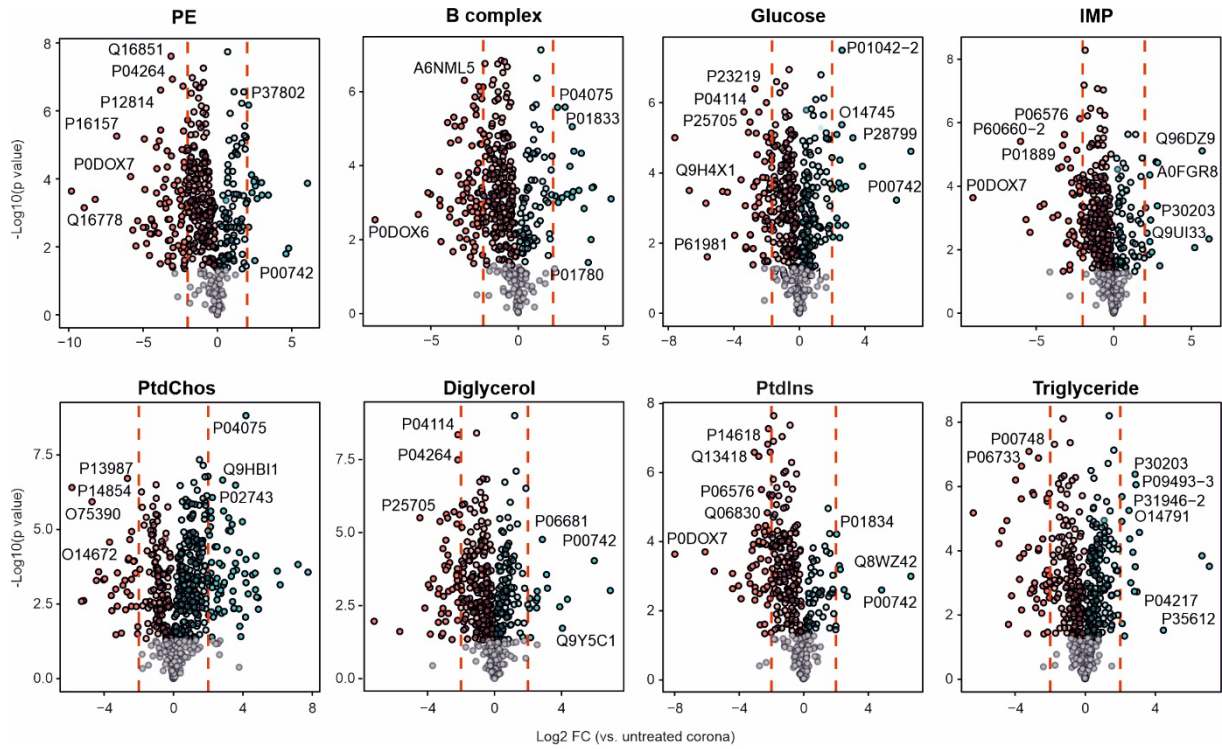

**Supplementary Fig. 4. The enrichment and depletion of specific proteins (only those shared) by spiking small molecules in NP protein corona vs. the abundance of proteins in the untreated NP protein corona. Only the results for the highest concentration of each small molecule (1000  $\mu\text{g}/\text{ml}$ ) are shown.**

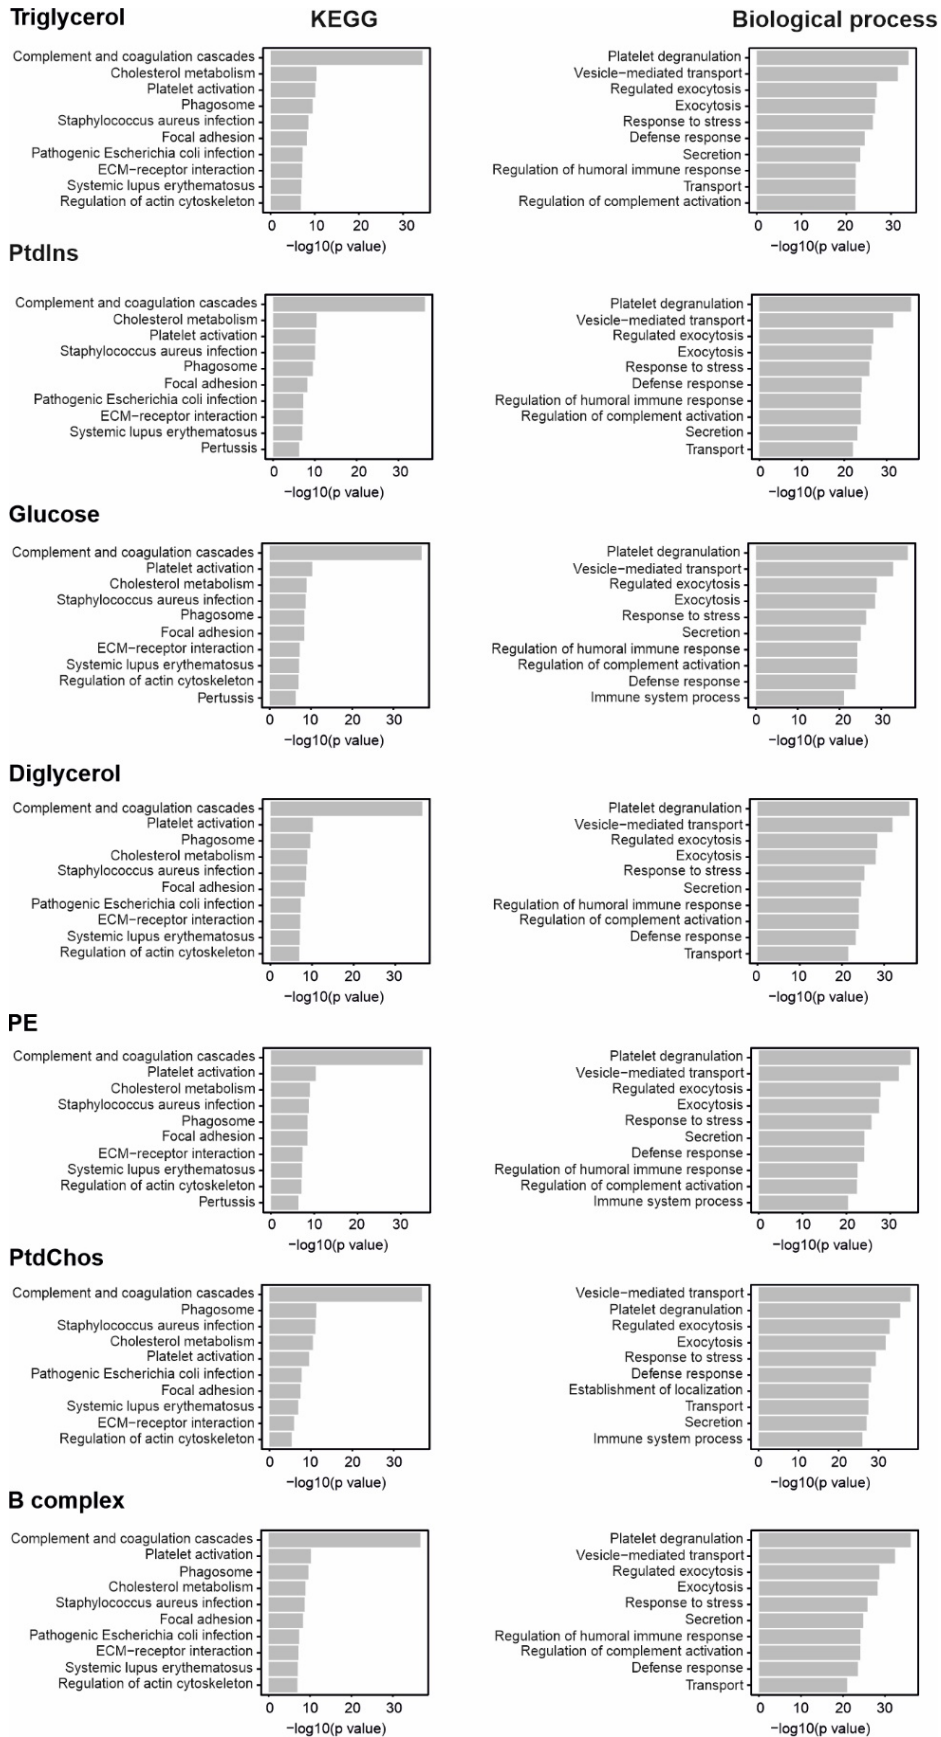

**Supplementary Fig. 5. Pathway enrichment for all significantly enriched and depleted proteins for each small molecule cumulatively across all concentrations. KEGG and biological processes are shown.**

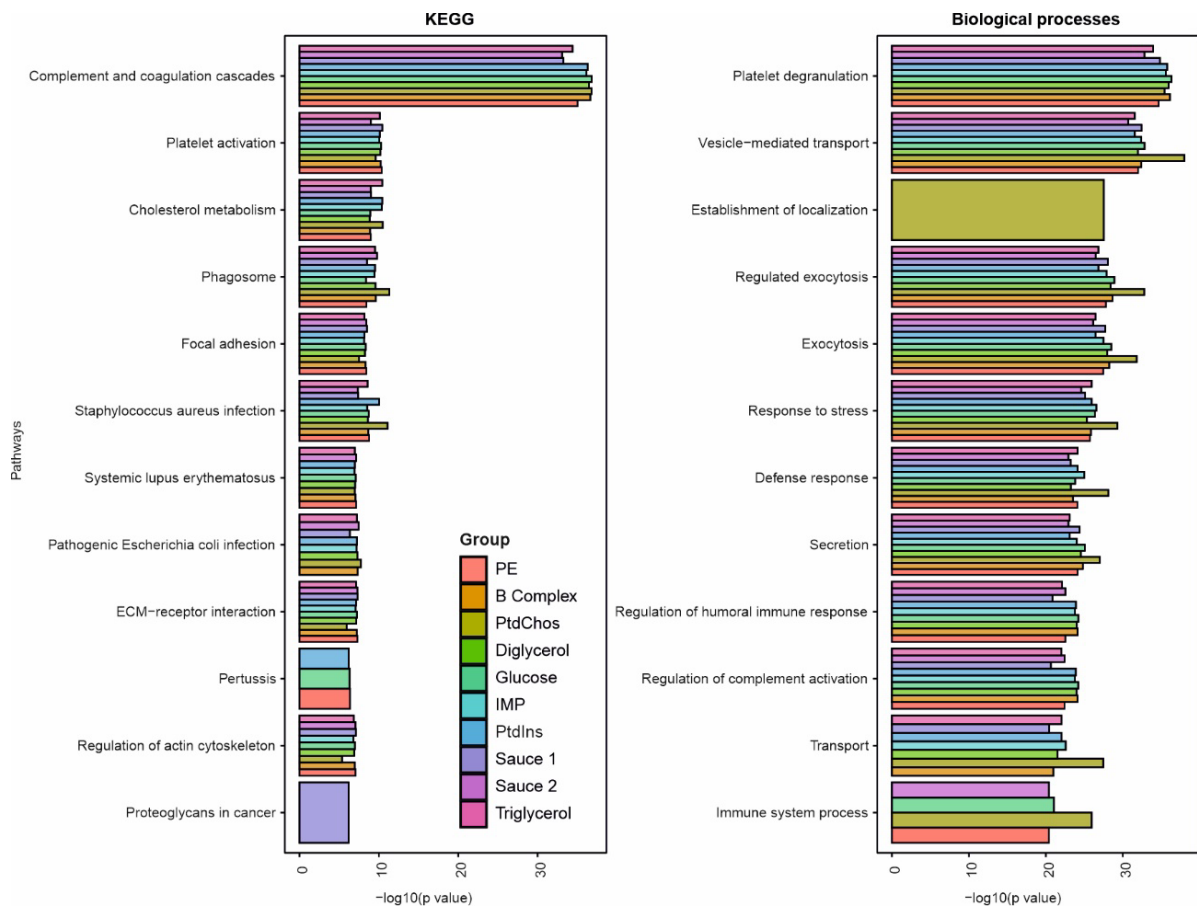

**Supplementary Fig. 6.** The combined enrichment plot for all small molecules and molecular sauces vs. untreated protein corona, cumulatively across all concentrations.



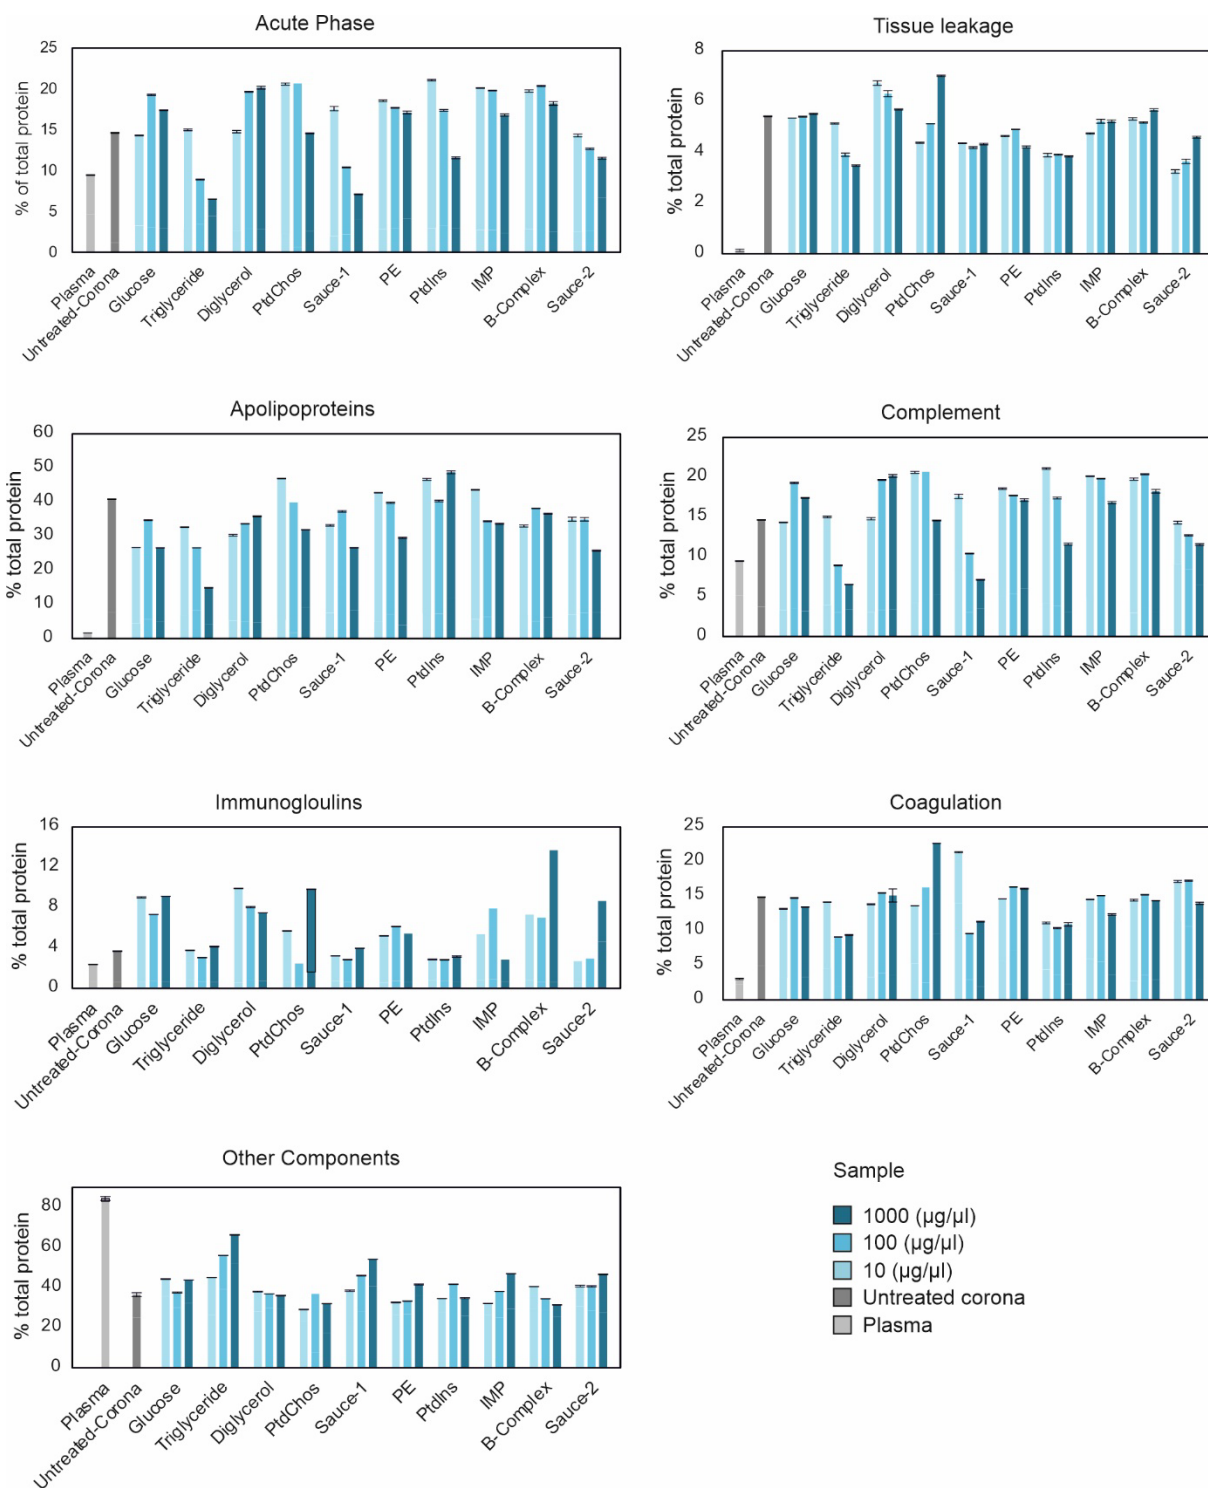

**Supplementary Fig. 7. Classification of quantified protein corona of various small molecules according to their physiological functions.**

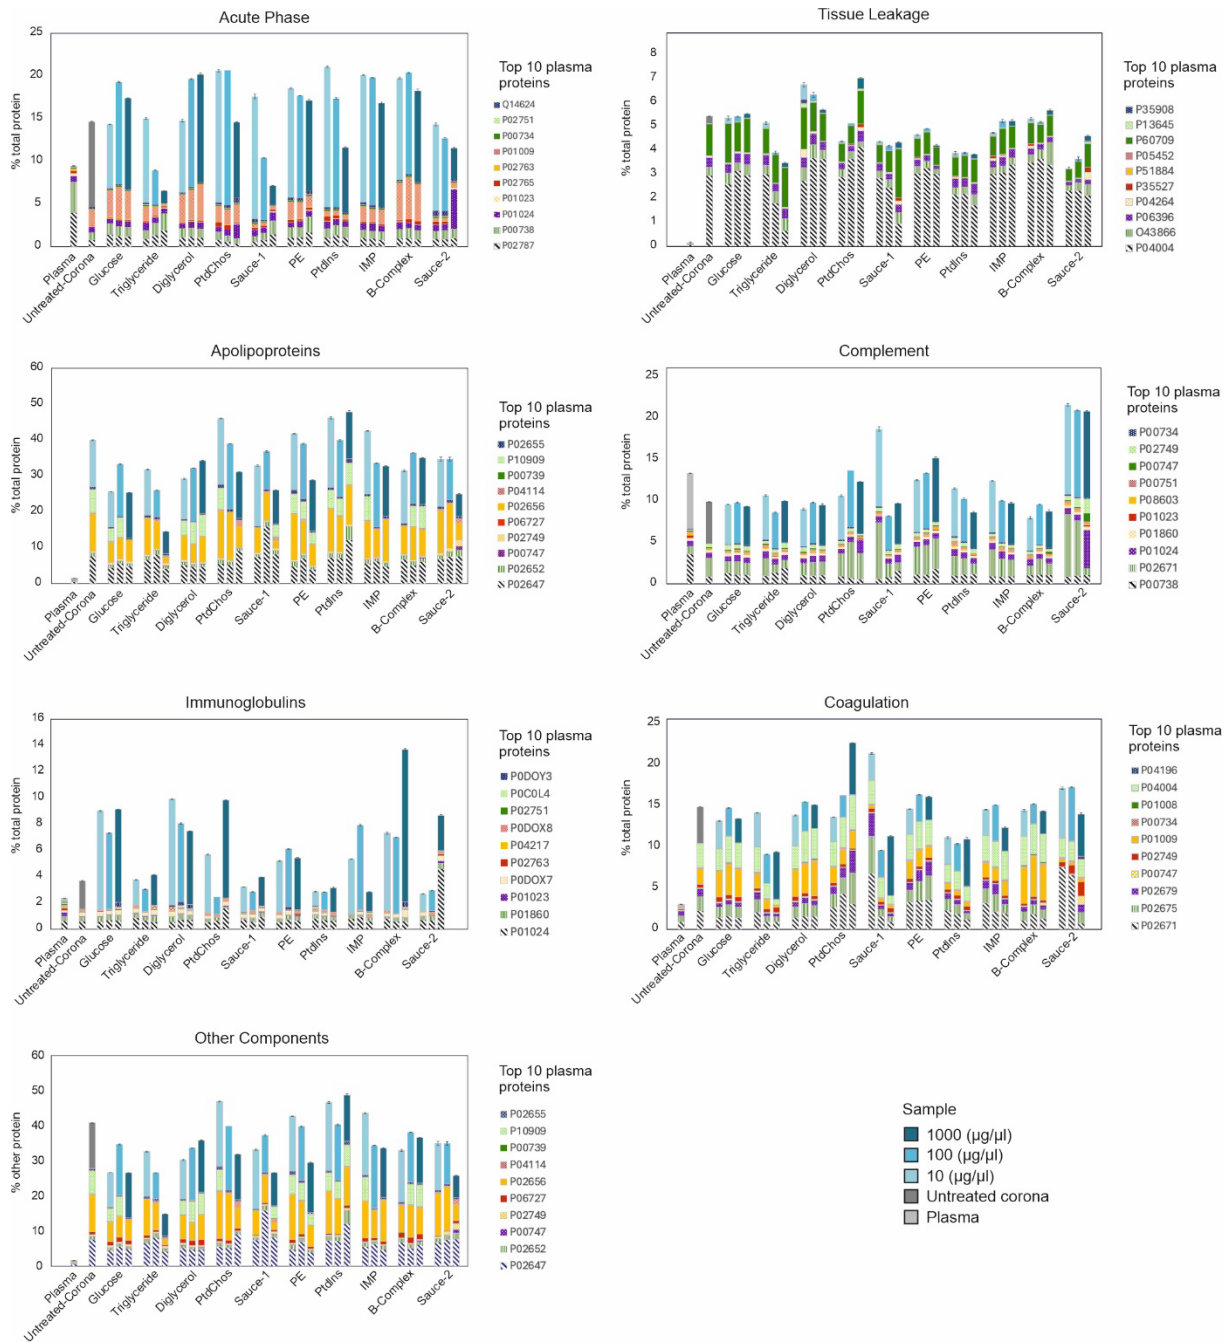

**Supplementary Fig. 8. Variations of top 10 plasma proteins across protein corona compositions of various small molecules according to their physiological functions.**

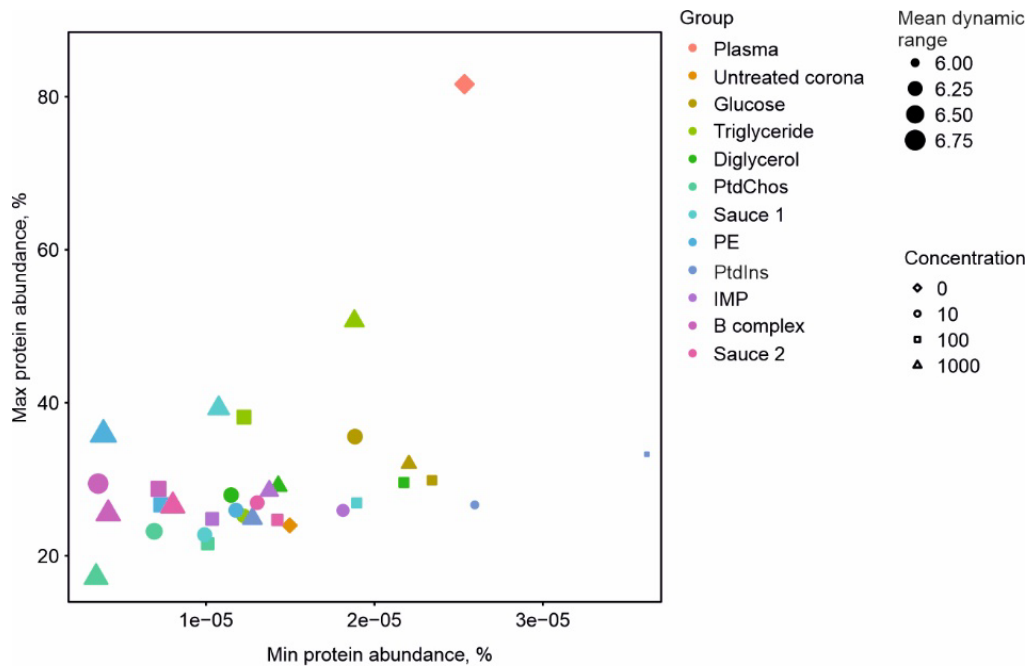

**Supplementary Fig. 9. The impact of spiking small molecules on the proteome dynamic range.** The dynamic range (order of magnitude) of the proteomics analysis for different samples is shown.
